# Supplementary material for: Splice site m6A methylation prevents binding of U2AF35 to inhibit RNA splicing
Source: PubMed Central journal article supplement (PMC8208822; doi:10.1016/j.cell.2021.03.062), 2021-06-10
Supplement: mmc1.pdf [file mmc1.pdf]

**Cell, Volume 184**

**Supplemental information**

**Splice site m<sup>6</sup>A methylation prevents binding  
of U2AF35 to inhibit RNA splicing**

**Mateusz Mendel, Kamila Delaney, Radha Raman Pandey, Kuan-Ming Chen, Joanna M. Wenda, Cathrine Broberg Vågbø, Florian A. Steiner, David Homolka, and Ramesh S. Pillai**

**Table S1. List of all deep-sequencing libraries created in this study. Related to STAR Methods and Figures 1-4.**

Data is available from Gene Expression Omnibus (GEO: GSE146873).

| sample | experiment                                                 | description          | reads     | sequencing type |
|--------|------------------------------------------------------------|----------------------|-----------|-----------------|
| RR723  | m6A profiling on RNA mix from mouse, worm and BmN4-SID1    | INPUT-Total RNA-1    | 78748292  | single-end      |
| RR724  | m6A profiling on RNA mix from mouse, worm and BmN4-SID1    | INPUT-Total RNA-2    | 109227705 | single-end      |
| RR725  | m6A profiling on RNA mix from mouse, worm and BmN4-SID1    | INPUT-Total RNA-3    | 98509826  | single-end      |
| RR726  | m6A profiling on RNA mix from mouse, worm and BmN4-SID1    | INPUT-PolyA+ RNA-1   | 111319107 | single-end      |
| RR727  | m6A profiling on RNA mix from mouse, worm and BmN4-SID1    | INPUT-PolyA+ RNA-2   | 111369816 | single-end      |
| RR728  | m6A profiling on RNA mix from mouse, worm and BmN4-SID1    | INPUT-PolyA+ RNA-3   | 104925272 | single-end      |
| RR729  | m6A profiling on RNA mix from mouse, worm and BmN4-SID1    | m6A IP-Total RNA-1   | 97238279  | single-end      |
| RR730  | m6A profiling on RNA mix from mouse, worm and BmN4-SID1    | m6A IP-Total RNA-2   | 116365247 | single-end      |
| RR731  | m6A profiling on RNA mix from mouse, worm and BmN4-SID1    | m6A IP-Total RNA-3   | 103682866 | single-end      |
| RR732  | m6A profiling on RNA mix from mouse, worm and BmN4-SID1    | m6A IP-PolyA+ RNA-1  | 99423158  | single-end      |
| RR733  | m6A profiling on RNA mix from mouse, worm and BmN4-SID1    | m6A IP-PolyA+ RNA-2  | 90657183  | single-end      |
| RR734  | m6A profiling on RNA mix from mouse, worm and BmN4-SID1    | m6A IP-PolyA+ RNA-3  | 105299920 | single-end      |
| RR618  | m6A profiling of the worm Mett-10 KO and WT on NA22 plates | input_totalRNA_WT-1  | 107952378 | pair-end        |
| RR619  | m6A profiling of the worm Mett-10 KO and WT on NA22 plates | input_totalRNA_WT-2  | 104276535 | pair-end        |
| RR620  | m6A profiling of the worm Mett-10 KO and WT on NA22 plates | input_totalRNA_WT-3  | 99043875  | pair-end        |
| RR621  | m6A profiling of the worm Mett-10 KO and WT on NA22 plates | m6A_IP_totalRNA_WT-1 | 88177640  | pair-end        |
| RR622  | m6A profiling of the worm Mett-10 KO and WT on NA22 plates | m6A_IP_totalRNA_WT-2 | 92603501  | pair-end        |
| RR623  | m6A profiling of the worm Mett-10 KO and WT on NA22 plates | m6A_IP_totalRNA_WT-3 | 80301018  | pair-end        |
| RR624  | m6A profiling of the worm Mett-10 KO and WT on NA22 plates | input_polyA_2_WT-1   | 51187060  | pair-end        |
| RR625  | m6A profiling of the worm Mett-10 KO and WT on NA22 plates | input_polyA_2_WT-2   | 52291052  | pair-end        |
| RR626  | m6A profiling of the worm Mett-10 KO and WT on NA22 plates | input_polyA_2_WT-3   | 33117898  | pair-end        |
| RR627  | m6A profiling of the worm Mett-10 KO and WT on NA22 plates | input_polyA_2_KO-1   | 39691391  | pair-end        |
| RR628  | m6A profiling of the worm Mett-10 KO and WT on NA22 plates | input_polyA_2_KO-2   | 35240657  | pair-end        |
| RR629  | m6A profiling of the worm Mett-10 KO and WT on NA22 plates | input_polyA_2_KO-3   | 39991008  | pair-end        |
| RR630  | m6A profiling of the worm Mett-10 KO and WT on NA22 plates | m6A_IP_polyA_2_WT-1  | 12022240  | pair-end        |
| RR631  | m6A profiling of the worm Mett-10 KO and WT on NA22 plates | m6A_IP_polyA_2_WT-2  | 36551759  | pair-end        |
| RR632  | m6A profiling of the worm Mett-10 KO and WT on NA22 plates | m6A_IP_polyA_2_WT-3  | 25683360  | pair-end        |
| RR633  | m6A profiling of the worm Mett-10 KO and WT on NA22 plates | m6A_IP_polyA_2_KO-1  | 54841480  | pair-end        |
| RR634  | m6A profiling of the worm Mett-10 KO and WT on NA22 plates | m6A_IP_polyA_2_KO-2  | 44893258  | pair-end        |
| RR635  | m6A profiling of the worm Mett-10 KO and WT on NA22 plates | m6A_IP_polyA_2_KO-3  | 43057847  | pair-end        |
| RR600  | m6A profiling of the worm Mett-10 KO and WT on NA22 plates | input_polyA_1_WT-1   | 22391643  | pair-end        |
| RR601  | m6A profiling of the worm Mett-10 KO and WT on NA22 plates | input_polyA_1_WT-2   | 23096755  | pair-end        |
| RR602  | m6A profiling of the worm Mett-10 KO and WT on NA22 plates | input_polyA_1_WT-3   | 19042425  | pair-end        |
| RR603  | m6A profiling of the worm Mett-10 KO and WT on NA22 plates | m6A_IP_polyA_1_WT-1  | 18362889  | pair-end        |
| RR604  | m6A profiling of the worm Mett-10 KO and WT on NA22 plates | m6A_IP_polyA_1_WT-2  | 18425770  | pair-end        |
| RR605  | m6A profiling of the worm Mett-10 KO and WT on NA22 plates | m6A_IP_polyA_1_WT-3  | 18620691  | pair-end        |
| RR892  | m6A profiling of the worm Mett-10 KO and WT on OP50 plates | input_polyA_WT-1     | 44602975  | single-end      |
| RR893  | m6A profiling of the worm Mett-10 KO and WT on OP50 plates | input_polyA_WT-2     | 57428958  | single-end      |
| RR894  | m6A profiling of the worm Mett-10 KO and WT on OP50 plates | input_polyA_WT-3     | 63145019  | single-end      |
| RR895  | m6A profiling of the worm Mett-10 KO and WT on OP50 plates | input_polyA_KO-1     | 56220445  | single-end      |
| RR896  | m6A profiling of the worm Mett-10 KO and WT on OP50 plates | input_polyA_KO-2     | 46443279  | single-end      |
| RR897  | m6A profiling of the worm Mett-10 KO and WT on OP50 plates | input_polyA_KO-3     | 42188533  | single-end      |
| RR898  | m6A profiling of the worm Mett-10 KO and WT on OP50 plates | m6A_IP_polyA_WT-1    | 11536036  | single-end      |
| RR899  | m6A profiling of the worm Mett-10 KO and WT on OP50 plates | m6A_IP_polyA_WT-2    | 11339449  | single-end      |
| RR900  | m6A profiling of the worm Mett-10 KO and WT on OP50 plates | m6A_IP_polyA_WT-3    | 11065165  | single-end      |
| RR901  | m6A profiling of the worm Mett-10 KO and WT on OP50 plates | m6A_IP_polyA_KO-1    | 14331371  | single-end      |
| RR902  | m6A profiling of the worm Mett-10 KO and WT on OP50 plates | m6A_IP_polyA_KO-2    | 13228517  | single-end      |
| RR903  | m6A profiling of the worm Mett-10 KO and WT on OP50 plates | m6A_IP_polyA_KO-3    | 12318564  | single-end      |

**Table S3. DNA primers and RNA oligonucleotides used in this study. Related to STAR Methods and Figures 1-6.**

| Name                                | Sequence                                                                                                                                                                                                                                                                                                      | Name in the study/Comments                                                                                                                         |
|-------------------------------------|---------------------------------------------------------------------------------------------------------------------------------------------------------------------------------------------------------------------------------------------------------------------------------------------------------------|----------------------------------------------------------------------------------------------------------------------------------------------------|
| <b>Worm mutants</b>                 |                                                                                                                                                                                                                                                                                                               |                                                                                                                                                    |
| oKDMM42                             | GGTGATTGTTGTTCCGAGTGC                                                                                                                                                                                                                                                                                         | Reverse primer for detecting and sequencing of intron 2 deletion in <i>sams-3</i> . If edit is present, it creates 473 bp with oKDMM43             |
| oKDMM43                             | GTGACCAGGTAAGTAACCAACG                                                                                                                                                                                                                                                                                        | Forward primer for detecting and sequencing of intron 2 deletion in <i>sams-3</i> . If edit is present, it creates 473 bp with oKDMM42             |
| oKDMM41                             | GACTCCAGCAGCGATTTCAG                                                                                                                                                                                                                                                                                          | Forward primer for detecting and sequencing of intron 2 deletion in <i>sams-4</i> . If edit is present, it creates 433 bp with oKDMM44             |
| oKDMM44                             | ACGTTATCTCCGAAGCGTAG                                                                                                                                                                                                                                                                                          | Reverse primer for detecting and sequencing of intron 2 deletion in <i>sams-4</i> . If edit is present, it creates 433 bp with oKDMM41             |
| oKDMM12                             | GCAACGTGTCGCTAAAGAGG                                                                                                                                                                                                                                                                                          | Forward primer for detecting and sequencing of intron 2 deletion in <i>sams-5</i> . If edit is present, it creates 526 bp with oKDMM39             |
| oKDMM39                             | TCCGCTGCTTACCTTTTCGAG                                                                                                                                                                                                                                                                                         | Reverse primer for detecting and sequencing of intron 2 deletion in <i>sams-5</i> . If edit is present, it creates 526 bp with oKDMM12             |
| oKDMM17                             | CCGTTCATCCCAACTCCATC                                                                                                                                                                                                                                                                                          | Forward primer to detect and sequence C-terminal HA tag in <i>sams-3</i> . If edit is present, it creates 554 bp band with oKDMM17                 |
| oKDMM18                             | ATGAACCAACCGCTGAGAAC                                                                                                                                                                                                                                                                                          | Reverse primer to detect and sequence C-terminal HA tag in <i>sams-3</i> . If edit is present, it creates 554 bp band with oKDMM17 to be sequenced |
| oFsa0131                            | TGTGGTGTGGCAGAGTAG                                                                                                                                                                                                                                                                                            | Forward primer to detect and sequence deletion of <i>mett-10</i> . If edit is present, it creates around 260 bp band with oFsa0195                 |
| oFsa0195                            | ATGTCCATGCCAACATCCAGC                                                                                                                                                                                                                                                                                         | Reverse primer to detect and sequence deletion of <i>mett-10</i> . If edit is present, it creates around 260 bp band with oFsa0131                 |
| oKDMM5                              | AAACTTGATTGTACAATGCTGAG                                                                                                                                                                                                                                                                                       | sgRNAs for C-terminal HA tagging of <i>sams-3</i>                                                                                                  |
| oKDMM6                              | TCTTGTGACACATTGTACAATCAA                                                                                                                                                                                                                                                                                      |                                                                                                                                                    |
| oKDMM7                              | CGATCTCAACCGAAATGGAATTGCTCATGGAGGAGGATCAATGGGAGGATACCCATATGATGTTCCAGATTACGCTGGCAGTTAACGATTGTACAATGCTGATTCAATTTGTTG                                                                                                                                                                                            | Repair template for the C-terminal tagging of <i>sams-3</i>                                                                                        |
| oKDMM19                             | AAACTTCTGTAATCAAAGTAACC                                                                                                                                                                                                                                                                                       | sgRNA for removing intron 2 of <i>sams-3</i> , <i>sams-4</i> and <i>sams-5</i>                                                                     |
| oKDMM20                             | TCTTGGTTACTTTGATTACAGAAA                                                                                                                                                                                                                                                                                      |                                                                                                                                                    |
| oKDMM21                             | AAACTTGTAAACAGGTAAGAAACC                                                                                                                                                                                                                                                                                      |                                                                                                                                                    |
| oKDMM22                             | TCTTGGTTTCTTACCTGTTACAA                                                                                                                                                                                                                                                                                       | sgRNA for removing intron 2 of <i>sams-4</i>                                                                                                       |
| oKDMM23                             | AAACCTGAATCACTCACCACAAGCAC                                                                                                                                                                                                                                                                                    |                                                                                                                                                    |
| oKDMM24                             | TCTTGTGCTTGTGGTGAGTGATTACAGG                                                                                                                                                                                                                                                                                  |                                                                                                                                                    |
| oKDMM25                             | AAACCAAGCAACCTTAGCGTGAGC                                                                                                                                                                                                                                                                                      | sgRNA for removing intron 2 of <i>sams-4</i>                                                                                                       |
| oKDMM26                             | TCTTGTCTACGCTAAGTTGCTTG                                                                                                                                                                                                                                                                                       |                                                                                                                                                    |
| oKDMM27                             | TCTTGTCTACGCAAAAGTTGCTATG                                                                                                                                                                                                                                                                                     |                                                                                                                                                    |
| oKDMM28                             | AAACATGCAACCTTTGCGTGAG                                                                                                                                                                                                                                                                                        | sgRNA for removing intron 2 of <i>sams-3</i>                                                                                                       |
| oKDMM29                             | TCTTGAAGGTTGCTATGTTGTAAG                                                                                                                                                                                                                                                                                      |                                                                                                                                                    |
| oKDMM30                             | AAACCTTACCACATGCAACCTTTC                                                                                                                                                                                                                                                                                      |                                                                                                                                                    |
| oKDMM31                             | AAACACAGTTTCTGTAAAACCTTAC                                                                                                                                                                                                                                                                                     | sgRNA for removing intron 2 of <i>sams-5</i>                                                                                                       |
| oKDMM32                             | TCTTGTAAAGTTTACGAAACTGT                                                                                                                                                                                                                                                                                       |                                                                                                                                                    |
| oKDMM33                             | AAACCAAGCAACCTTGGCGTGAGC                                                                                                                                                                                                                                                                                      |                                                                                                                                                    |
| oKDMM34                             | TCTTGTCTACGCCAAAGTTGCTTG                                                                                                                                                                                                                                                                                      | sgRNA for removing intron 2 of <i>sams-5</i>                                                                                                       |
| oKDMM35                             | CGACAGCTTTCGAGGTGATCTCACCGCACAAACATGATCATACCCGTTTGTAGTCACTGTTTCAACAGCAACCTTAGCGTGAGGGTCTTGAGCCAGATGAGCG                                                                                                                                                                                                       |                                                                                                                                                    |
| oKDMM36                             | CGCTGTTCTTGATGCTCATTTGGCTCAAGATCCTCACGCAAAAGTTGCTATGAAACAGTGAATAAACCGGGTATGATCATGTTGTGGGTGAGATCACCTC                                                                                                                                                                                                          |                                                                                                                                                    |
| oKDMM37                             | CAGCTTTGAGGTGATCTCACCGCACAAACATGATCATACCCGTTTGGTCACTGTTTACAAAGCAACCTTGGCGTGAGGATCCTGAGCCAAGTGAAGCATC                                                                                                                                                                                                          | Repair template for removing intron 2 in <i>sams-5</i>                                                                                             |
| <b>sams-3 artificial constructs</b> |                                                                                                                                                                                                                                                                                                               |                                                                                                                                                    |
| DH298                               | ACGAAGTGTTCACCTT                                                                                                                                                                                                                                                                                              | Forward primer for <i>sams-3</i> FL amplification                                                                                                  |
| DH299                               | CTCAATAAATGATTTTTTATAAG                                                                                                                                                                                                                                                                                       | Reverse primer for <i>sams-3</i> FL amplification                                                                                                  |
| DH300                               | CCCTAGAACACCGTCTGTTACATCAAGAACAGCGTCCGAGAT                                                                                                                                                                                                                                                                    | Primer to introduce specific sequences into exon2                                                                                                  |
| DH301                               | TGAACGACCGTGTCTAGGAGCGCAAAGTTGCATGTG                                                                                                                                                                                                                                                                          | Primer to introduce specific sequences into exon2                                                                                                  |
| DH302                               | TACGCATCAAAAGTAGGCTGTGGACGAGAACCTGTGATGTC                                                                                                                                                                                                                                                                     | Primer to introduce specific sequences into exon3                                                                                                  |
| DH303                               | ACAGCCTACTTTGAGTGCGTAATACGATGATTCCTCGAAG                                                                                                                                                                                                                                                                      | Primer to introduce specific sequences into exon3                                                                                                  |
| DH304                               | CTTATAAAAATCAATTTATTGAGCCTGCGAGCCTGGCATGC                                                                                                                                                                                                                                                                     | Forward primer for pUC19 fragment amplification                                                                                                    |
| DH305                               | AAGGTTGAACACTTCGTTGTTGTTCTGGAAATTGAGA                                                                                                                                                                                                                                                                         | Reverse primer for pUC19 fragment amplification                                                                                                    |
| MM320                               | GATTACAGACTTGGTGACTAAAACGGGTATG                                                                                                                                                                                                                                                                               | Forward primer for METT-10 consensus motif mutation                                                                                                |
| MM321                               | TTAGTACCAAGTCTGTAATCAAAGTAACCG                                                                                                                                                                                                                                                                                | Reverse primer for METT-10 consensus motif mutation                                                                                                |
| <b>HeLa splicing constructs</b>     |                                                                                                                                                                                                                                                                                                               |                                                                                                                                                    |
| MM415                               | ATGGCTAGCCACCAGAGTGTTCACCTTACAAC                                                                                                                                                                                                                                                                              | Forward primer for <i>sams-3</i> FL cloning into phRL-TK vector                                                                                    |
| MM416                               | CATGCGGCCGCTCTAGAACTCAATAAATGATTTTTTATAAGGTC                                                                                                                                                                                                                                                                  | Forward primer for <i>sams-3</i> FL cloning into phRL-TK vector                                                                                    |
| <b>Splicing</b>                     |                                                                                                                                                                                                                                                                                                               |                                                                                                                                                    |
| MM378                               | GGTGAACGTGGATGAAGTTGGTGGTGGGCCCCGGGAGGTTGGTATCAAGGTTACAAGACA GGTTTAAGGAGACCAATAGAAACTGGGCATGTGGAGACAGAGAAGACTCTGGCCCTCGAGGT TCTGATAGGCACTGACTCTCTGCTATTGGTCTATTTCCACCCTTAGGCTGCTGGTG GTCACCTTGGACCCAGAGGTTCTTGGAGATATCCGTACACCATCAGGGTACGAGCTAGC CCATGGCGTACACCATCAGGTTAGACTAGTAGATCTCTACACCATCAGGGTACGGAATTC | Human B-globin with T7 promoter                                                                                                                    |
| MM379                               | TAATACGACTCACTATAGGTTGAACGTTGATGAAGTTG                                                                                                                                                                                                                                                                        | Forward primer to amplify 3' fragment of B-globin                                                                                                  |
| MM460                               | /52MOErG//i2MOErG/GAAAAATAGACCAATAGGCAG                                                                                                                                                                                                                                                                       | Reverse primer to amplify 3' fragment of B-globin                                                                                                  |
| MM_RNA_59                           | /5phos/ACCCATAGGCTGCTGGTGGTCTACCTTGGACCCAGAGGTTCTTTGAG                                                                                                                                                                                                                                                        | Unmethylated oligo for B-globin pre-mRNA ligation                                                                                                  |

|                               |                                                                                                                                                                                                                   |                                                                             |
|-------------------------------|-------------------------------------------------------------------------------------------------------------------------------------------------------------------------------------------------------------------|-----------------------------------------------------------------------------|
| MM_RNA_60                     | /5phos/ACCCCTm6AGGCTGCTGGTGGTCTACCCCTGGACCCAGAGGTCTTTTGAG                                                                                                                                                         | Splice site methylated oligo for B-globin pre-mRNA ligation                 |
| MM_RNA_61                     | /5phos/ACCCCTAGGCTGCTGGTGGTCTm6ACCCCTGGACCCAGAGGTCTTTTGAG                                                                                                                                                         | Exon methylated oligo for B-globin pre-mRNA ligation                        |
| MM453                         | CTGGGTCCAAGGGTAGACCACCAGCAGCCTAAGGGTGGGAAAAATAGACCAATAGGCAGA                                                                                                                                                      | Splint oligo for B-globin ligation                                          |
| MINX_FL                       | CCACTCTGGATCGGAAACCCGTCGGCCTCCGAACGGTAAAGAGCCTAGCATGTAGAAGTGGT<br>TACCTGCAGCCCAAGCTTGTCTGCAGCTGTAGGGCCAGTAGTCCAGGGTTTCCTGTGATGATG<br>TCATACTTACTCTGCCCTTTTTTCCACAGCTCGCGGTGAGGACGACAAACTCTTCGGG<br>GTCTTCCAGTGGGG | MINX pre-mRNA sequence                                                      |
| MM_RNA_85                     | /5phos/cacagctcgcggttgaggacaaactcttcgcggtctttccagtgg                                                                                                                                                              | Unmethylated oligo for MINX pre-mRNA ligation                               |
| MM_RNA_86                     | /5phos/cacm6Agctcgcggttgaggacaaactcttcgcggtctttccagtgg                                                                                                                                                            | Splice site methylated oligo for MINX pre-mRNA ligation                     |
| MM_RNA_87                     | /5phos/cacagctcgcggttgagg/in6Me-rA/caaactcttcgcggtctttccagtgg                                                                                                                                                     | Exon methylated oligo for MINX pre-mRNA ligation                            |
| MM578                         | gagtttctcctcaaccgagctgtggaaaaaaaagg                                                                                                                                                                               | Splint oligo for MINX ligation                                              |
| MM617                         | TAATACGACTACTATAGGGCCACTCTGGATCGGAAACCC                                                                                                                                                                           | Forward primer to amplify 3' fragment of MINX                               |
| MM582                         | /52MOErG//i2MOErA/aaaaaaaggacaggaTaagtatgac                                                                                                                                                                       | Reverse primer to amplify 3' fragment of MINX                               |
| MM583                         | /52MOErG//i2MOErT/gtgttaaaaggacaggaTaagtatg                                                                                                                                                                       | Reverse primer to amplify 3' fragment of the weak polypyrimidine tract MINX |
| MM585                         | gagtttctcctcaaccgagctgtggtgtgtaaaagg                                                                                                                                                                              | Splint oligo for the weak polypyrimidine tract MINX ligation                |
| <b>sams-3 RT-PCR</b>          |                                                                                                                                                                                                                   |                                                                             |
| MM395                         | CTCGGACGCTGTTCTTGTATG                                                                                                                                                                                             | PCR for intron retention, endogenous sams-3                                 |
| MM396                         | AACCTGGTAGTCGACGACAG                                                                                                                                                                                              | PCR for intron retention, endogenous sams-3                                 |
| MM363                         | TGTGAACGACCCGTGTCTTAGG                                                                                                                                                                                            | PCR for intron retention in mini-gene constructs                            |
| MM364                         | CGTATTACGCACTCAAGTAGGC                                                                                                                                                                                            | PCR for intron retention in mini-gene constructs                            |
| <b>Mett116 knock-in mice</b>  |                                                                                                                                                                                                                   |                                                                             |
| tracerRNA                     |                                                                                                                                                                                                                   |                                                                             |
| CD.Cas9.PGDV2419.AB<br>RNA    | CTCAAAGGAACCACTACGCG GUUUUAGAGCUAUGCU                                                                                                                                                                             | gRNA for cat-dead and RNA-binding mutant <i>Mett116</i> mouse               |
| MM233                         | TCATCTCCCTAGTGGTGAAGTGCCTGCAAGACACTCTGATGGATGCGCTTAAAGAAGAG<br>TCTGAGATAGTCTATGACTTCTGTATGTCAACCCCTCCGGCTTCGCCAACCATTGGAAGC<br>CAAGGTACAGTACCTTTAAAGTTACCAATGCTTAGCTAGCTTTTACATCATTGCAGAGATA<br>TCAACAAAAGGCAG    | ssDNA template for homology recombination for F187G modification            |
| MM232                         | TCATCTCCCTAGTGGTGAAGTGCCTGCAAGACACTCTGATGGATGCGCTTAAAGAAGAG<br>TCTGAGATAGTCTATGACTTCTGTATGTCAACCCCTCCGGCTTCGCCAACCATTGGAAGC<br>CAAGGTACAGTACCTTTAAAGTTACCAATGCTTAGCTAGCTTTTACATCATTGCAGAGATA<br>AGAACAAAAGGCAG    | ssDNA template for homology recombination for 185AA-PP186 modification      |
| MM342                         | TCTCCATTGTGCGAGGCTCTG                                                                                                                                                                                             | Forward primer for F187G genotyping                                         |
| MM343                         | CTTCCAAATGGTTGGCGAAGC                                                                                                                                                                                             | Reverse primer for F187G genotyping                                         |
| MM348                         | CGTCTCCATTGTGCGAGGTC                                                                                                                                                                                              | Forward primer for PP185-186AA genotyping                                   |
| MM349                         | ATTGGTTGGCAAAAATGCGGC                                                                                                                                                                                             | Reverse primer for PP185-186AA genotyping                                   |
| MM340                         | AACTTGATGCGCTCCATTG                                                                                                                                                                                               | Forward primer to amplify the whole catalytic site region for sequencing    |
| MM341                         | TGGTAACCTTTAAAGTACTGTACC                                                                                                                                                                                          | Reverse primer to amplify the whole catalytic site region for sequencing    |
| <b>Mett116 conditional KO</b> |                                                                                                                                                                                                                   |                                                                             |
| MM101                         | aaagatttgcttggcggtttcc                                                                                                                                                                                            | Forward primer to detect loxP insertion in the <i>Mett116</i> locus         |
| MM102                         | cccaggaagtggcactatcaag                                                                                                                                                                                            | Reverse primer to detect loxP insertion in the <i>Mett116</i> locus         |
| oIMR7643                      | CACGTGCAGCCGTTTAAAGCCGCT                                                                                                                                                                                          | Forward primer for <i>Ddx4-cre</i> genotyping                               |
| iIMR7644                      | TTCCATTCTAAACAACCCCTGAA                                                                                                                                                                                           | Reverse primer for <i>Ddx4-cre</i> genotyping                               |
| MM314                         | AAATTCAAATGGCATTGGG                                                                                                                                                                                               | Forward primer for <i>Mett116</i> deletion genotyping                       |
| MM315                         | CCGAATCCTCATCTATTACATTG                                                                                                                                                                                           | Reverse primer for <i>Mett116</i> deletion genotyping                       |
| <b>In vitro methylation</b>   |                                                                                                                                                                                                                   |                                                                             |
|                               |                                                                                                                                                                                                                   | <b>Name in the study/Comments</b>                                           |
| MM_RNA_5                      | CCCCCCCUGAGGUACAGAGAAGGGGGGG                                                                                                                                                                                      | Mouse 3'UTR ; 29nt                                                          |
| MM_RNA_6                      | UGUUGGCGUAGGUACAGAGAAGCCUUA                                                                                                                                                                                       | Mouse 3'UTR mut ; 29nt                                                      |
| MM_RNA_31                     | ACAACGGUUACUUUGAUUACAGAAACGGUGACUAAAACGG                                                                                                                                                                          | RNA-0; 40nt                                                                 |
| MM_RNA_32                     | GGUUAUUUGAUUACAGAAACGGUGACUAA                                                                                                                                                                                     | RNA-1 ; 30nt                                                                |
| MM_RNA_34                     | GGUUAUUUGAUUACAGAAACGGUGACUAA                                                                                                                                                                                     | RNA-2 ; 30nt                                                                |
| MM_RNA_33                     | GGUUAUUUGAUUACAGAAACGGUGACUAA                                                                                                                                                                                     | RNA-3 ; 30nt                                                                |
| MM_RNA_35                     | GGUUAUUUGAUUACAGAAACGGUGACUAA                                                                                                                                                                                     | RNA-4 ; 30nt                                                                |
| MM_RNA_36                     | GGUUAUUUGAUUACAGAAACGGUGACUAA                                                                                                                                                                                     | RNA-5 ; 30nt                                                                |
| MM_RNA_37                     | GGUUAUUUGAUUACAGAAACGGUGACUAA                                                                                                                                                                                     | RNA-6 ; 30nt                                                                |
| MM_RNA_43                     | GGUUAUUUGAUUACAGAAACGGUGACUAA                                                                                                                                                                                     | RNA-7 ; 30nt                                                                |
| MM_RNA_38                     | CCCCCCCUCAGAAACCCCGCCC                                                                                                                                                                                            | RNA-8 ; 25nt                                                                |
| MM_RNA_39                     | CCCCCCCUCAGAAACGGGGGGG                                                                                                                                                                                            | RNA-9 ; 25nt                                                                |
| MM_RNA_100                    | GGUUAUUUGAUUACAGAAACUCUAUUGGAA                                                                                                                                                                                    | RNA-10 ; 30nt                                                               |
| MM_RNA_101                    | UCAGUGGUUGAUUACAGAAACUCUAUUGGAA                                                                                                                                                                                   | RNA-11 ; 30nt                                                               |
| MM_RNA_120                    | GGUUAUUUGAUUACAGAAACGGUGUGAA                                                                                                                                                                                      | RNA-12 ; 30nt                                                               |
| MM_RNA_121                    | GCAUAUUUGAUUACAGAAACGGUGUGAA                                                                                                                                                                                      | RNA-13 ; 30nt                                                               |
| MM_RNA_122                    | GGUUAUUUGAUUACAGAAACGGUGUGAA                                                                                                                                                                                      | RNA-14 ; 30nt                                                               |
| MM_RNA_123                    | GCAUUGUUUGAUUACAGAAACGGUGUGAA                                                                                                                                                                                     | RNA-15 ; 30nt                                                               |
| MM_RNA_124                    | CCCCCUUUGAUUACAGAAACGGGGGGAA                                                                                                                                                                                      | RNA-16 ; 30nt                                                               |
| MM_RNA_44                     | AAACUUUUUUUUUUAAGAAACUGUUGCUAA                                                                                                                                                                                    | Mouse ; 30nt                                                                |
| MM_RNA_45                     | AAACUUUUUUUUUUAAGAAACUGUUGCUAA                                                                                                                                                                                    | Mouse mut ; 30nt                                                            |
| MM_RNA_46                     | UUUUUUUUUUUUAAGAAACUUAACUAA                                                                                                                                                                                       | Silkworm ; 30nt                                                             |
| MM_RNA_47                     | UUUUUUUUUUUUAAGAAACUUAACUAA                                                                                                                                                                                       | Silkworm mut ; 30nt                                                         |
| MM_RNA_48                     | CAUAAUUUUUUUAAGAAACGUCGCCAA                                                                                                                                                                                       | Fly ; 30nt                                                                  |
| MM_RNA_49                     | CAUAAUUUUUUUAAGAAACGUCGCCAA                                                                                                                                                                                       | Fly mut ; 30nt                                                              |
| MM_RNA_67                     | UAUUUUUUUUUUUUAAGAAACUUAACUAA                                                                                                                                                                                     | RNA-67/Muc11 ; 40nt                                                         |
| MM_RNA_68                     | AGAGUGGUUUUUUUUAAGAAACUUAACUAA                                                                                                                                                                                    | RNA-68/Spag1 ; 40nt                                                         |
| MM_RNA_69                     | AAUCUUUUUUUUUUUUAAGAAACUUAACUAA                                                                                                                                                                                   | RNA-69/Pla2r1 ; 40nt                                                        |
| MM_RNA_70                     | UUUCUGGAAUUUUUUUAAGAAACUUAACUAA                                                                                                                                                                                   | RNA-70/Gyg ; 40nt                                                           |
| MM_RNA_71                     | GCAUUGGUGGGUCUUUUUAAGAAACUUAACUAA                                                                                                                                                                                 | RNA-71/Des ; 40nt                                                           |
| MM_RNA_72                     | AUGCAAAACUUUUUUUAAGAAACUUAACUAA                                                                                                                                                                                   | RNA-72/Helt ; 40nt                                                          |
| MM_RNA_73                     | ACUCUUUUUUUUUUUUUAAGAAACUUAACUAA                                                                                                                                                                                  | RNA-73/Pecam ; 40nt                                                         |
| MM_RNA_74                     | AUUUUUUUUUUUUUUUAAGAAACUUAACUAA                                                                                                                                                                                   | RNA-74/Gm48535 ; 40nt                                                       |
| MM_RNA_75                     | CUUUUGGGCUUUUUUUUAAGAAACUUAACUAA                                                                                                                                                                                  | RNA-75/Gm15810 ; 40nt                                                       |
| MM_RNA_76                     | GAUGCUUUUUUUUUUUUAAGAAACUUAACUAA                                                                                                                                                                                  | RNA-76/Tjp2 ; 40nt                                                          |
| MM_RNA_80                     | UAGAAUUUUUUUUUUUUUAAGAAACUUAACUAA                                                                                                                                                                                 | Sorbs1 ; 45nt                                                               |
| MM_RNA_81                     | UAAUUGUUUUUUUUUUUUUAAGAAACUUAACUAA                                                                                                                                                                                | Lrppc ; 40nt                                                                |

|                |                                                                                                                         |                                         |
|----------------|-------------------------------------------------------------------------------------------------------------------------|-----------------------------------------|
| RP RNA 19      | GCGUCUUUACGGUGCUUAAAACAAAACAAAACAAAACAAA                                                                                | 40 nt RNA marker                        |
| RP RNA 1       | TGACATGAACACAGGTGCTCAGATAGCTTT                                                                                          | 30 nt RNA marker                        |
| RP RNA 3       | UGACAUGAACACAGGUCUCAGAUAGCU                                                                                             | 28 nt RNA marker                        |
| RP RNA 18      | AGCACCGUAAAGACGC                                                                                                        | 16 nt RNA marker                        |
| <b>ITC</b>     |                                                                                                                         |                                         |
| KM RNA 10      | CUAGG                                                                                                                   | ITC experiment; 5 nt                    |
| KM RNA 11      | CUm6AGG                                                                                                                 | ITC experiment; 5 nt                    |
| <b>SCARLET</b> |                                                                                                                         |                                         |
| MM437          | GGAGAGACAACCTAAAGAGACTTAAAAGATTAATTTAAAATTTATCAAAAAGAGTATTGACT<br>TAAAGTCTAACCTATAGGATACTTACAGCCATCGCCGGTCTGTGAGTTAATAG | Universal DNA oligo for splint ligation |
| MM438          | TGATCATACCCGTTTTAGTCACCGTTTCTCTATTAACCTCACAGGACCGCGATGGCTG                                                              | sams-3 splint oligo                     |
| MM698          | mCmGmUmUmUmCmU GTAA mUmCmAmAmAmGmU                                                                                      | sams-3 chimera                          |
| MM614          | CCTTGCGCAGGGCCATGCTAATCTTCTCTCTATTAACCTCACAGGACCGCGATGGCTG                                                              | U6snRNA splint oligo                    |
| MM702          | mCmUmUmCmUmCmU GTAT mUmGmUmUmCmC                                                                                        | U6 snRNA chimera                        |
| MM616          | CCACTTTTATATCTATAGCGCGCTGTCTATTAACCTCACAGGACCGCGATGGCTG                                                                 | Positive control splint oligo           |
| MM615          | mGmCmGmUmUmGmU TCAG mAmGmUmCmUmAmA                                                                                      | Positive control chimera                |
| MM RNA 98      | UUAGACUCUGAACACGCGCGCUAUGAGAUUAAAAAGUGG                                                                                 | Positive control oligo - unmethylated   |
| MM RNA 99      | UUAGACUCUGAm6ACAACGCGCGCUAUGAUUAAAAAGUGG                                                                                | Positive control oligo - methylated     |
| MM RNA 96      | GTTACAACGGTTACTTTGATTACAGAAACGGTGACTAAAACGGGT                                                                           | sams-3 control oligo - unmethylated     |
| MM RNA 97      | GTTACAACGGTTACTTTGATTACm6AGAAACGGTGACTAAAACGGGT                                                                         | sams-3 control oligo - methylated       |

**Table S4. Composition of nutrient-low and nutrient-high plates used for *C. elegans* culture. Related to Figure 1-4**

**Nutrient-low media**

|                                        |                               |
|----------------------------------------|-------------------------------|
| <b>NGM (nematode growth medium)</b>    | <b>2 litres</b>               |
| Agar                                   | 35 g                          |
| Peptone                                | 5 g                           |
| Phosphate Buffer pH 6,0 + NaCl         | 50 ml phosphate buffer + NaCl |
| MgSO4 1 M                              | 2 ml                          |
| CaCl2 1 M                              | 2 ml                          |
| Cholesterol in ETOH (5 mg/ml)          | 2 ml                          |
|                                        |                               |
| <b>Buffer NGM Phosphate + NaCl 40X</b> | <b>2 litres</b>               |
| 1 M Phosphate Buffer pH:6.0            | 72 g K2HPO4                   |
|                                        | 216 g KH2PO4                  |
| 2 M NaCl                               | 240 g NaCl                    |

**Nutrient-high media**

|                                                |                               |
|------------------------------------------------|-------------------------------|
| <b>Pepton-rich plates</b>                      | <b>2 litres</b>               |
| Agar                                           | 50 g                          |
| Peptone                                        | 40 g                          |
| Phosphate Buffer pH: 6,0 + NaCl                | 50 ml phosphate buffer + NaCl |
| MgSO4 1M                                       | 2 ml                          |
| Cholesterol in ETOH (5 mg/ml)                  | 2 ml                          |
|                                                |                               |
| <b>Buffer Pepton Rich Phosphate + NaCl 40X</b> | <b>2 litres</b>               |
| 1 M Phosphate Buffer                           | 40 g K2HPO4                   |
|                                                | 240 g KH2PO4                  |
| 820 mM NaCl                                    | 96 g NaCl                     |

**Table S5: List of worm strains used in this study. Related to Figure 1-4.**

| Strain | Genotype                                                                                           | Source     | Comments                                                                                                                                                          |
|--------|----------------------------------------------------------------------------------------------------|------------|-------------------------------------------------------------------------------------------------------------------------------------------------------------------|
| N2     | wild type                                                                                          | CGC        | wild type strain                                                                                                                                                  |
| VC1743 | <i>mett-10 (ok2204) III</i>                                                                        | CGC        | <i>Mett-10</i> deletion                                                                                                                                           |
| FAS198 | <i>sams-3 (uge125) IV</i>                                                                          | This study | <i>sams-3</i> intron 2 deletion                                                                                                                                   |
| FAS199 | <i>sams-4 (uge126) IV</i>                                                                          | This study | <i>sams-4</i> intron 2 deletion                                                                                                                                   |
| FAS200 | <i>sams-3 (uge127) IV; sams-4 (uge126) IV</i>                                                      | This study | <i>sams-3</i> intron 2 deletion and <i>sams-4</i> intron 2 deletion                                                                                               |
| FAS201 | <i>sams-4 (uge126) IV; sams-5 (uge128) IV</i>                                                      | This study | <i>sams-4</i> intron 2 deletion and <i>sams-5</i> intron 2 deletion                                                                                               |
| FAS202 | <i>sams-3 (uge129) IV; sams-4 (uge126) IV; sams-5 (uge128) IV</i>                                  | This study | <i>sams3</i> intron 2 deletion, <i>sams-4</i> intron 2 deletion and <i>sams-5</i> intron 2 deletion                                                               |
| FAS203 | <i>sams-3 ((uge130) [sams-3::HA]) IV</i>                                                           | This study | HA-tagged <i>sams-3</i>                                                                                                                                           |
| FAS204 | <i>sams-3 (uge131) IV; sams-3 ((uge130) [sams-3::HA]) IV</i>                                       | This study | HA-tagged <i>sams-3</i> with intron 2 deleted                                                                                                                     |
| FAS206 | <i>sams-3 ((uge130) [sams-3::HA]) IV; sams-1 (uge132) [OLLAS::sams-1 ] X; mett-10 (ok2204) III</i> | This study | HA-tagged <i>sams-3</i> with <i>mett-10</i> deletion<br>NOTE: This strain has <i>sams-1</i> tagged with OLLAS in the background, which was not used in this study |
